# Supplementary material for: Towards a comprehensive framework for movement and distortion correction of diffusion MR images: Within volume movement
Source: PubMed Central journal article supplement (PMC5445723; doi:10.1016/j.neuroimage.2017.02.085), 2017-05-15
Supplement: mmc6.pdf [file mmc6.pdf]

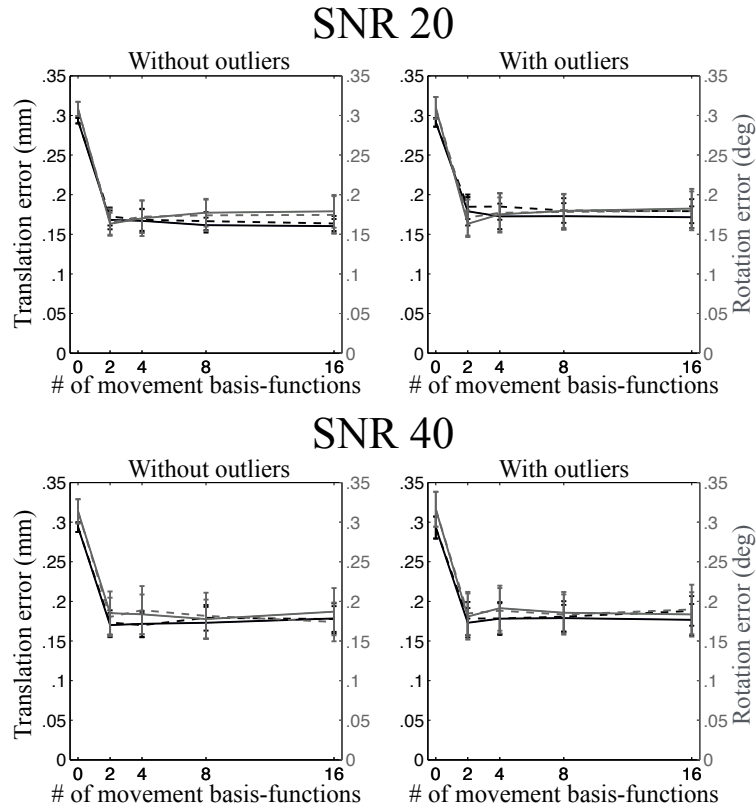

Figure S3: This figure shows the registration error for large movement and multi-band acquisition. The translation errors (averaged over all axes) are shown in black and the rotation errors (also averaged around all axes) are shown in grey. The solid lines pertain to regularisation of the movement with  $\lambda = 1$  and the dashed lines with  $\lambda = 10$ .

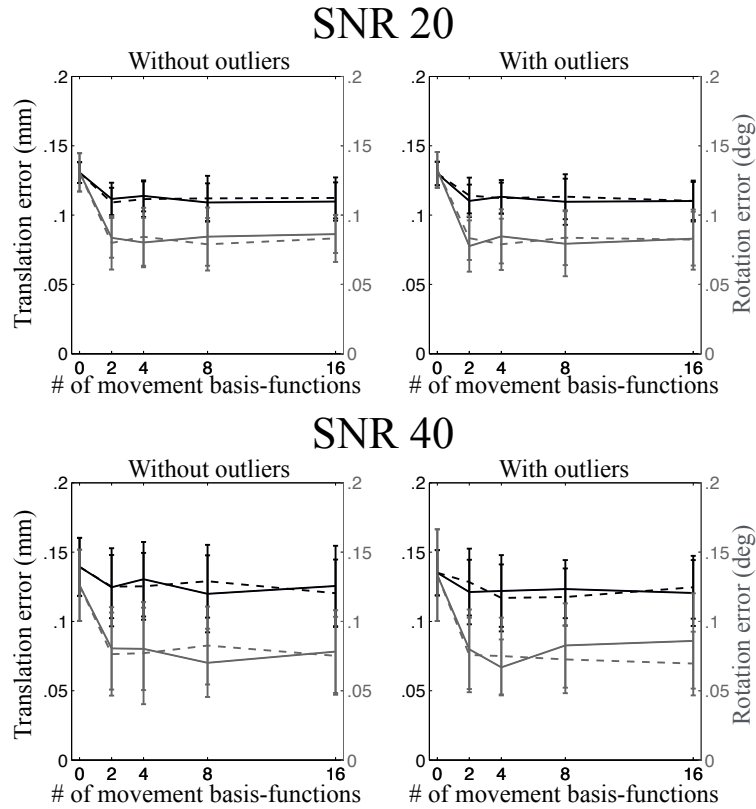

Figure S4: This figure shows the registration error for “normal” movement and multi-band acquisition. The translation errors (averaged over all axes) are shown in black and the rotation errors (also averaged around all axes) are shown in grey. The solid lines pertain to regularisation of the movement with  $\lambda = 1$  and the dashed lines with  $\lambda = 10$ .

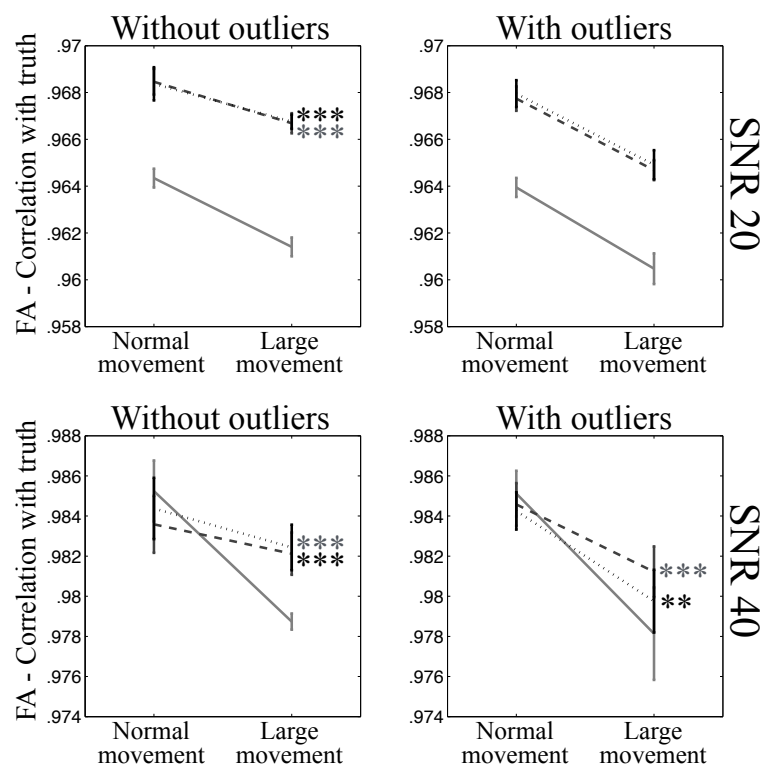

Figure S5: This figure shows the correlation between estimated and true FA for “normal” and “large” movement after correction of movements and distortions with *eddy* for the multi-band data with short TR. The solid line shows results after correction using the volume-to-volume model and the dashed and dotted lines using the slice-to-volume model with 8 and 16 basis-functions respectively. A statistical test (testing for unequal slopes) was performed to assess whether the difference between the “normal” and “large” movements was greater for volume-to-volume correction compared to the pertinent slice-to-volume model. Significance was indicated with \* ( $p \leq 0.05$ ), \*\* ( $p \leq 0.01$ ) or \*\*\* ( $p \leq 0.001$ ).

| Band:       |     | SB               |       |       |       |       |       |       |       |       |
|-------------|-----|------------------|-------|-------|-------|-------|-------|-------|-------|-------|
| Movement:   |     | Large            |       |       |       |       |       |       |       |       |
| Data:       |     | Without outliers |       |       |       |       |       |       |       |       |
| SNR:        |     | 40               |       |       |       |       |       |       |       |       |
| MP-order:   |     | 0                | 2     |       | 4     |       | 8     |       | 16    |       |
| $\lambda$ : |     |                  | 1     | 10    | 1     | 10    | 1     | 10    | 1     | 10    |
| $b=0$       | xt: | 1.130            | 0.430 | 0.430 | 0.261 | 0.259 | 0.157 | 0.154 | 0.179 | 0.154 |
|             | yt: | 1.323            | 0.340 | 0.340 | 0.182 | 0.182 | 0.115 | 0.107 | 0.145 | 0.114 |
|             | zt: | 1.081            | 0.353 | 0.353 | 0.202 | 0.202 | 0.111 | 0.110 | 0.116 | 0.106 |
|             | xr: | 1.170            | 0.243 | 0.243 | 0.161 | 0.161 | 0.132 | 0.134 | 0.177 | 0.156 |
|             | yr: | 0.582            | 0.461 | 0.462 | 0.315 | 0.314 | 0.227 | 0.224 | 0.226 | 0.226 |
|             | zr: | 0.713            | 0.210 | 0.209 | 0.138 | 0.138 | 0.077 | 0.077 | 0.078 | 0.072 |
| $b=700$     | xt: | 0.536            | 0.124 | 0.121 | 0.113 | 0.105 | 0.106 | 0.106 | 0.113 | 0.106 |
|             | yt: | 0.490            | 0.236 | 0.240 | 0.290 | 0.255 | 0.285 | 0.255 | 0.256 | 0.231 |
|             | zt: | 0.385            | 0.136 | 0.139 | 0.114 | 0.111 | 0.134 | 0.128 | 0.141 | 0.134 |
|             | xr: | 0.459            | 0.088 | 0.095 | 0.081 | 0.091 | 0.091 | 0.094 | 0.106 | 0.086 |
|             | yr: | 0.770            | 0.236 | 0.229 | 0.206 | 0.216 | 0.234 | 0.206 | 0.219 | 0.212 |
|             | zr: | 0.470            | 0.106 | 0.117 | 0.107 | 0.118 | 0.133 | 0.132 | 0.119 | 0.123 |
| $b=2000$    | xt: | 0.439            | 0.216 | 0.187 | 0.170 | 0.160 | 0.188 | 0.179 | 0.158 | 0.183 |
|             | yt: | 0.369            | 0.278 | 0.286 | 0.321 | 0.305 | 0.301 | 0.289 | 0.294 | 0.273 |
|             | zt: | 0.436            | 0.183 | 0.205 | 0.149 | 0.170 | 0.163 | 0.152 | 0.167 | 0.174 |
|             | xr: | 0.543            | 0.123 | 0.155 | 0.133 | 0.142 | 0.153 | 0.149 | 0.141 | 0.138 |
|             | yr: | 0.736            | 0.224 | 0.199 | 0.231 | 0.220 | 0.235 | 0.191 | 0.248 | 0.191 |
|             | zr: | 0.269            | 0.127 | 0.129 | 0.107 | 0.129 | 0.157 | 0.152 | 0.130 | 0.147 |

Table S1: Registration error for single-band simulations with large motion, no outliers and an SNR of 40.

### S.3 Tables of registration error

| Band:       |     | SB               |       |       |       |       |       |       |       |       |
|-------------|-----|------------------|-------|-------|-------|-------|-------|-------|-------|-------|
| Movement:   |     | Large            |       |       |       |       |       |       |       |       |
| Data:       |     | Without outliers |       |       |       |       |       |       |       |       |
| SNR:        |     | 20               |       |       |       |       |       |       |       |       |
| MP-order:   |     | 0                | 2     |       | 4     |       | 8     |       | 16    |       |
| $\lambda$ : |     |                  | 1     | 10    | 1     | 10    | 1     | 10    | 1     | 10    |
| $b=0$       | xt: | 1.130            | 0.430 | 0.430 | 0.261 | 0.259 | 0.165 | 0.157 | 0.181 | 0.157 |
|             | yt: | 1.324            | 0.340 | 0.340 | 0.182 | 0.182 | 0.117 | 0.107 | 0.145 | 0.115 |
|             | zt: | 1.081            | 0.353 | 0.353 | 0.202 | 0.202 | 0.111 | 0.111 | 0.117 | 0.107 |
|             | xr: | 1.171            | 0.243 | 0.243 | 0.162 | 0.161 | 0.144 | 0.141 | 0.178 | 0.161 |
|             | yr: | 0.583            | 0.461 | 0.462 | 0.315 | 0.314 | 0.224 | 0.224 | 0.227 | 0.225 |
|             | zr: | 0.713            | 0.210 | 0.210 | 0.139 | 0.139 | 0.078 | 0.079 | 0.081 | 0.072 |
| $b=700$     | xt: | 0.538            | 0.116 | 0.122 | 0.106 | 0.105 | 0.116 | 0.106 | 0.107 | 0.100 |
|             | yt: | 0.471            | 0.226 | 0.241 | 0.271 | 0.228 | 0.246 | 0.227 | 0.278 | 0.209 |
|             | zt: | 0.382            | 0.139 | 0.139 | 0.131 | 0.121 | 0.143 | 0.134 | 0.158 | 0.138 |
|             | xr: | 0.455            | 0.091 | 0.092 | 0.097 | 0.098 | 0.105 | 0.105 | 0.127 | 0.097 |
|             | yr: | 0.777            | 0.262 | 0.252 | 0.235 | 0.246 | 0.242 | 0.229 | 0.230 | 0.234 |
|             | zr: | 0.472            | 0.123 | 0.117 | 0.127 | 0.118 | 0.107 | 0.120 | 0.136 | 0.116 |
| $b=2000$    | xt: | 0.444            | 0.209 | 0.196 | 0.186 | 0.181 | 0.173 | 0.160 | 0.178 | 0.165 |
|             | yt: | 0.368            | 0.265 | 0.268 | 0.286 | 0.268 | 0.282 | 0.260 | 0.281 | 0.260 |
|             | zt: | 0.428            | 0.223 | 0.203 | 0.185 | 0.177 | 0.195 | 0.178 | 0.204 | 0.180 |
|             | xr: | 0.533            | 0.143 | 0.143 | 0.161 | 0.142 | 0.201 | 0.165 | 0.204 | 0.168 |
|             | yr: | 0.738            | 0.247 | 0.246 | 0.331 | 0.299 | 0.318 | 0.291 | 0.313 | 0.299 |
|             | zr: | 0.266            | 0.120 | 0.113 | 0.114 | 0.124 | 0.128 | 0.124 | 0.129 | 0.116 |

Table S2: Registration error for single-band simulations with large motion, no outliers and an SNR of 20.

| Band:       | SB            |       |       |       |       |       |       |       |       |       |
|-------------|---------------|-------|-------|-------|-------|-------|-------|-------|-------|-------|
| Movement:   | Large         |       |       |       |       |       |       |       |       |       |
| Data:       | With outliers |       |       |       |       |       |       |       |       |       |
| SNR:        | 40            |       |       |       |       |       |       |       |       |       |
| MP-order:   | 0             | 2     |       | 4     |       | 8     |       | 16    |       |       |
| $\lambda$ : |               | 1     | 10    | 1     | 10    | 1     | 10    | 1     | 10    |       |
| $b=0$       | xt:           | 1.130 | 0.430 | 0.430 | 0.261 | 0.259 | 0.153 | 0.151 | 0.179 | 0.152 |
|             | yt:           | 1.323 | 0.340 | 0.340 | 0.182 | 0.182 | 0.114 | 0.107 | 0.145 | 0.113 |
|             | zt:           | 1.081 | 0.353 | 0.353 | 0.202 | 0.202 | 0.110 | 0.109 | 0.117 | 0.106 |
|             | xr:           | 1.170 | 0.243 | 0.243 | 0.161 | 0.161 | 0.126 | 0.128 | 0.177 | 0.150 |
|             | yr:           | 0.582 | 0.460 | 0.461 | 0.315 | 0.314 | 0.228 | 0.225 | 0.226 | 0.226 |
|             | zr:           | 0.713 | 0.209 | 0.209 | 0.138 | 0.138 | 0.078 | 0.078 | 0.077 | 0.075 |
| $b=700$     | xt:           | 0.537 | 0.122 | 0.126 | 0.117 | 0.113 | 0.123 | 0.108 | 0.120 | 0.113 |
|             | yt:           | 0.496 | 0.236 | 0.239 | 0.280 | 0.242 | 0.278 | 0.252 | 0.270 | 0.230 |
|             | zt:           | 0.383 | 0.146 | 0.132 | 0.143 | 0.139 | 0.161 | 0.141 | 0.160 | 0.145 |
|             | xr:           | 0.460 | 0.101 | 0.124 | 0.096 | 0.094 | 0.129 | 0.111 | 0.144 | 0.112 |
|             | yr:           | 0.772 | 0.225 | 0.224 | 0.210 | 0.216 | 0.243 | 0.230 | 0.234 | 0.225 |
|             | zr:           | 0.485 | 0.121 | 0.121 | 0.117 | 0.122 | 0.114 | 0.133 | 0.125 | 0.127 |
| $b=2000$    | xt:           | 0.441 | 0.184 | 0.223 | 0.198 | 0.169 | 0.156 | 0.183 | 0.169 | 0.195 |
|             | yt:           | 0.374 | 0.285 | 0.282 | 0.327 | 0.311 | 0.300 | 0.287 | 0.290 | 0.287 |
|             | zt:           | 0.437 | 0.190 | 0.197 | 0.174 | 0.159 | 0.168 | 0.170 | 0.169 | 0.178 |
|             | xr:           | 0.534 | 0.135 | 0.135 | 0.136 | 0.129 | 0.166 | 0.162 | 0.154 | 0.152 |
|             | yr:           | 0.738 | 0.206 | 0.205 | 0.222 | 0.232 | 0.256 | 0.213 | 0.249 | 0.215 |
|             | zr:           | 0.266 | 0.152 | 0.134 | 0.100 | 0.112 | 0.136 | 0.125 | 0.123 | 0.124 |

Table S3: Registration error for single-band simulations with large motion, outliers and an SNR of 40.

| Band:       | SB            |       |       |       |       |       |       |       |       |       |
|-------------|---------------|-------|-------|-------|-------|-------|-------|-------|-------|-------|
| Movement:   | Large         |       |       |       |       |       |       |       |       |       |
| Data:       | With outliers |       |       |       |       |       |       |       |       |       |
| SNR:        | 20            |       |       |       |       |       |       |       |       |       |
| MP-order:   | 0             | 2     |       | 4     |       | 8     |       | 16    |       |       |
| $\lambda$ : |               | 1     | 10    | 1     | 10    | 1     | 10    | 1     | 10    |       |
| $b=0$       | xt:           | 1.130 | 0.430 | 0.430 | 0.261 | 0.259 | 0.165 | 0.157 | 0.180 | 0.157 |
|             | yt:           | 1.324 | 0.340 | 0.340 | 0.182 | 0.182 | 0.118 | 0.107 | 0.145 | 0.114 |
|             | zt:           | 1.081 | 0.353 | 0.353 | 0.202 | 0.202 | 0.112 | 0.111 | 0.117 | 0.108 |
|             | xr:           | 1.171 | 0.243 | 0.243 | 0.162 | 0.162 | 0.144 | 0.141 | 0.176 | 0.161 |
|             | yr:           | 0.583 | 0.462 | 0.462 | 0.314 | 0.314 | 0.223 | 0.224 | 0.226 | 0.225 |
|             | zr:           | 0.713 | 0.210 | 0.210 | 0.139 | 0.139 | 0.079 | 0.079 | 0.076 | 0.072 |
| $b=700$     | xt:           | 0.539 | 0.122 | 0.124 | 0.106 | 0.102 | 0.117 | 0.108 | 0.125 | 0.112 |
|             | yt:           | 0.473 | 0.243 | 0.237 | 0.274 | 0.245 | 0.282 | 0.234 | 0.268 | 0.218 |
|             | zt:           | 0.385 | 0.147 | 0.149 | 0.136 | 0.136 | 0.166 | 0.150 | 0.175 | 0.149 |
|             | xr:           | 0.463 | 0.102 | 0.099 | 0.101 | 0.107 | 0.138 | 0.123 | 0.160 | 0.123 |
|             | yr:           | 0.767 | 0.270 | 0.253 | 0.253 | 0.254 | 0.257 | 0.241 | 0.256 | 0.236 |
|             | zr:           | 0.483 | 0.117 | 0.118 | 0.129 | 0.125 | 0.119 | 0.114 | 0.131 | 0.116 |
| $b=2000$    | xt:           | 0.444 | 0.201 | 0.201 | 0.179 | 0.191 | 0.176 | 0.172 | 0.186 | 0.171 |
|             | yt:           | 0.370 | 0.265 | 0.276 | 0.290 | 0.286 | 0.291 | 0.268 | 0.285 | 0.274 |
|             | zt:           | 0.429 | 0.209 | 0.216 | 0.193 | 0.197 | 0.206 | 0.217 | 0.195 | 0.190 |
|             | xr:           | 0.532 | 0.150 | 0.159 | 0.159 | 0.166 | 0.187 | 0.186 | 0.207 | 0.182 |
|             | yr:           | 0.737 | 0.270 | 0.266 | 0.331 | 0.302 | 0.333 | 0.299 | 0.332 | 0.285 |
|             | zr:           | 0.266 | 0.132 | 0.121 | 0.117 | 0.118 | 0.128 | 0.129 | 0.135 | 0.116 |

Table S4: Registration error for single-band simulations with large motion, outliers and an SNR of 20.

| Band:       |     | SB               |       |       |       |       |       |       |       |       |  |
|-------------|-----|------------------|-------|-------|-------|-------|-------|-------|-------|-------|--|
| Movement:   |     | Normal           |       |       |       |       |       |       |       |       |  |
| Data:       |     | Without outliers |       |       |       |       |       |       |       |       |  |
| SNR:        |     | 40               |       |       |       |       |       |       |       |       |  |
| MP-order:   |     | 0                | 2     |       | 4     |       | 8     |       | 16    |       |  |
| $\lambda$ : |     |                  | 1     | 10    | 1     | 10    | 1     | 10    | 1     | 10    |  |
| $b=0$       | xt: | 0.377            | 0.142 | 0.142 | 0.082 | 0.082 | 0.050 | 0.042 | 0.052 | 0.050 |  |
|             | yt: | 0.444            | 0.121 | 0.121 | 0.075 | 0.075 | 0.060 | 0.060 | 0.065 | 0.067 |  |
|             | zt: | 0.359            | 0.125 | 0.125 | 0.076 | 0.075 | 0.074 | 0.067 | 0.066 | 0.066 |  |
|             | xr: | 0.404            | 0.083 | 0.083 | 0.059 | 0.059 | 0.063 | 0.062 | 0.082 | 0.077 |  |
|             | yr: | 0.200            | 0.135 | 0.135 | 0.072 | 0.072 | 0.046 | 0.046 | 0.056 | 0.049 |  |
|             | zr: | 0.236            | 0.069 | 0.069 | 0.047 | 0.047 | 0.028 | 0.026 | 0.057 | 0.046 |  |
| $b=700$     | xt: | 0.245            | 0.086 | 0.078 | 0.082 | 0.102 | 0.093 | 0.113 | 0.115 | 0.111 |  |
|             | yt: | 0.273            | 0.121 | 0.125 | 0.147 | 0.133 | 0.146 | 0.145 | 0.167 | 0.137 |  |
|             | zt: | 0.132            | 0.097 | 0.104 | 0.105 | 0.103 | 0.105 | 0.082 | 0.088 | 0.088 |  |
|             | xr: | 0.169            | 0.039 | 0.043 | 0.049 | 0.043 | 0.063 | 0.065 | 0.077 | 0.062 |  |
|             | yr: | 0.294            | 0.138 | 0.138 | 0.122 | 0.124 | 0.157 | 0.153 | 0.183 | 0.188 |  |
|             | zr: | 0.154            | 0.035 | 0.034 | 0.060 | 0.038 | 0.050 | 0.051 | 0.060 | 0.048 |  |
| $b=2000$    | xt: | 0.200            | 0.249 | 0.248 | 0.238 | 0.208 | 0.241 | 0.275 | 0.228 | 0.193 |  |
|             | yt: | 0.246            | 0.261 | 0.251 | 0.271 | 0.258 | 0.263 | 0.262 | 0.266 | 0.262 |  |
|             | zt: | 0.197            | 0.169 | 0.166 | 0.168 | 0.164 | 0.194 | 0.157 | 0.154 | 0.150 |  |
|             | xr: | 0.197            | 0.087 | 0.073 | 0.090 | 0.094 | 0.102 | 0.098 | 0.113 | 0.100 |  |
|             | yr: | 0.257            | 0.099 | 0.101 | 0.109 | 0.154 | 0.165 | 0.156 | 0.148 | 0.166 |  |
|             | zr: | 0.189            | 0.123 | 0.137 | 0.180 | 0.150 | 0.180 | 0.161 | 0.182 | 0.135 |  |

Table S5: Registration error for single-band simulations with normal motion, no outliers and an SNR of 40.



| Band:       | SB               |       |       |       |       |       |       |       |       |       |
|-------------|------------------|-------|-------|-------|-------|-------|-------|-------|-------|-------|
| Movement:   | Normal           |       |       |       |       |       |       |       |       |       |
| Data:       | Without outliers |       |       |       |       |       |       |       |       |       |
| SNR:        | 20               |       |       |       |       |       |       |       |       |       |
| MP-order:   | 0                | 2     |       | 4     |       | 8     |       | 16    |       |       |
| $\lambda$ : |                  | 1     | 10    | 1     | 10    | 1     | 10    | 1     | 10    |       |
| $b=0$       | xt:              | 0.377 | 0.141 | 0.142 | 0.081 | 0.080 | 0.051 | 0.047 | 0.047 | 0.049 |
|             | yt:              | 0.444 | 0.119 | 0.120 | 0.073 | 0.074 | 0.061 | 0.062 | 0.064 | 0.068 |
|             | zt:              | 0.359 | 0.130 | 0.126 | 0.076 | 0.077 | 0.075 | 0.069 | 0.069 | 0.065 |
|             | xr:              | 0.404 | 0.082 | 0.083 | 0.059 | 0.060 | 0.064 | 0.062 | 0.079 | 0.078 |
|             | yr:              | 0.200 | 0.138 | 0.137 | 0.073 | 0.073 | 0.046 | 0.045 | 0.054 | 0.049 |
|             | zr:              | 0.236 | 0.070 | 0.070 | 0.047 | 0.047 | 0.029 | 0.028 | 0.059 | 0.046 |
| $b=700$     | xt:              | 0.210 | 0.095 | 0.093 | 0.094 | 0.112 | 0.111 | 0.087 | 0.111 | 0.106 |
|             | yt:              | 0.205 | 0.155 | 0.137 | 0.151 | 0.135 | 0.172 | 0.133 | 0.171 | 0.150 |
|             | zt:              | 0.144 | 0.096 | 0.117 | 0.116 | 0.105 | 0.125 | 0.128 | 0.100 | 0.116 |
|             | xr:              | 0.154 | 0.055 | 0.044 | 0.048 | 0.055 | 0.060 | 0.061 | 0.076 | 0.058 |
|             | yr:              | 0.341 | 0.184 | 0.148 | 0.157 | 0.174 | 0.184 | 0.143 | 0.199 | 0.170 |
|             | zr:              | 0.150 | 0.040 | 0.050 | 0.076 | 0.058 | 0.058 | 0.089 | 0.077 | 0.085 |
| $b=2000$    | xt:              | 0.209 | 0.152 | 0.139 | 0.164 | 0.161 | 0.157 | 0.187 | 0.161 | 0.151 |
|             | yt:              | 0.251 | 0.232 | 0.235 | 0.240 | 0.237 | 0.247 | 0.233 | 0.256 | 0.234 |
|             | zt:              | 0.179 | 0.147 | 0.163 | 0.183 | 0.164 | 0.188 | 0.191 | 0.135 | 0.162 |
|             | xr:              | 0.199 | 0.098 | 0.099 | 0.116 | 0.112 | 0.130 | 0.123 | 0.145 | 0.122 |
|             | yr:              | 0.253 | 0.219 | 0.212 | 0.217 | 0.236 | 0.243 | 0.208 | 0.286 | 0.250 |
|             | zr:              | 0.213 | 0.108 | 0.090 | 0.103 | 0.097 | 0.106 | 0.109 | 0.112 | 0.100 |

Table S6: Registration error for single-band simulations with normal motion, no outliers and an SNR of 20.

| Band:       | SB            |       |       |       |       |       |       |       |       |       |
|-------------|---------------|-------|-------|-------|-------|-------|-------|-------|-------|-------|
| Movement:   | Normal        |       |       |       |       |       |       |       |       |       |
| Data:       | With outliers |       |       |       |       |       |       |       |       |       |
| SNR:        | 40            |       |       |       |       |       |       |       |       |       |
| MP-order:   | 0             | 2     |       | 4     |       | 8     |       | 16    |       |       |
| $\lambda$ : |               | 1     | 10    | 1     | 10    | 1     | 10    | 1     | 10    |       |
| $b=0$       | xt:           | 0.377 | 0.142 | 0.142 | 0.083 | 0.081 | 0.051 | 0.040 | 0.052 | 0.053 |
|             | yt:           | 0.444 | 0.121 | 0.121 | 0.075 | 0.074 | 0.060 | 0.060 | 0.065 | 0.069 |
|             | zt:           | 0.359 | 0.125 | 0.125 | 0.076 | 0.076 | 0.075 | 0.066 | 0.067 | 0.068 |
|             | xr:           | 0.404 | 0.083 | 0.083 | 0.059 | 0.059 | 0.063 | 0.062 | 0.082 | 0.079 |
|             | yr:           | 0.199 | 0.135 | 0.136 | 0.072 | 0.072 | 0.045 | 0.046 | 0.055 | 0.049 |
|             | zr:           | 0.236 | 0.069 | 0.069 | 0.047 | 0.047 | 0.028 | 0.025 | 0.056 | 0.044 |
| $b=700$     | xt:           | 0.236 | 0.074 | 0.065 | 0.080 | 0.093 | 0.084 | 0.104 | 0.099 | 0.085 |
|             | yt:           | 0.251 | 0.148 | 0.148 | 0.187 | 0.150 | 0.164 | 0.157 | 0.173 | 0.131 |
|             | zt:           | 0.150 | 0.130 | 0.142 | 0.152 | 0.135 | 0.170 | 0.125 | 0.150 | 0.144 |
|             | xr:           | 0.158 | 0.067 | 0.061 | 0.079 | 0.071 | 0.096 | 0.100 | 0.122 | 0.091 |
|             | yr:           | 0.316 | 0.135 | 0.196 | 0.158 | 0.175 | 0.154 | 0.208 | 0.192 | 0.161 |
|             | zr:           | 0.154 | 0.041 | 0.053 | 0.069 | 0.067 | 0.071 | 0.074 | 0.082 | 0.061 |
| $b=2000$    | xt:           | 0.217 | 0.207 | 0.214 | 0.205 | 0.187 | 0.248 | 0.240 | 0.231 | 0.210 |
|             | yt:           | 0.251 | 0.255 | 0.258 | 0.265 | 0.254 | 0.278 | 0.261 | 0.269 | 0.250 |
|             | zt:           | 0.211 | 0.172 | 0.180 | 0.181 | 0.173 | 0.196 | 0.144 | 0.161 | 0.167 |
|             | xr:           | 0.199 | 0.105 | 0.092 | 0.121 | 0.108 | 0.130 | 0.125 | 0.157 | 0.127 |
|             | yr:           | 0.257 | 0.124 | 0.115 | 0.146 | 0.158 | 0.179 | 0.157 | 0.199 | 0.150 |
|             | zr:           | 0.175 | 0.114 | 0.131 | 0.114 | 0.095 | 0.138 | 0.138 | 0.158 | 0.120 |

Table S7: Registration error for single-band simulations with normal motion, outliers and an SNR of 40.

| Band:       |     | SB            |       |       |       |       |       |       |       |       |  |
|-------------|-----|---------------|-------|-------|-------|-------|-------|-------|-------|-------|--|
| Movement:   |     | Normal        |       |       |       |       |       |       |       |       |  |
| Data:       |     | With outliers |       |       |       |       |       |       |       |       |  |
| SNR:        |     | 20            |       |       |       |       |       |       |       |       |  |
| MP-order:   |     | 0             | 2     |       | 4     |       | 8     |       | 16    |       |  |
| $\lambda$ : |     |               | 1     | 10    | 1     | 10    | 1     | 10    | 1     | 10    |  |
| $b=0$       | xt: | 0.377         | 0.141 | 0.141 | 0.081 | 0.081 | 0.052 | 0.048 | 0.048 | 0.050 |  |
|             | yt: | 0.444         | 0.119 | 0.119 | 0.074 | 0.074 | 0.061 | 0.063 | 0.065 | 0.068 |  |
|             | zt: | 0.359         | 0.130 | 0.130 | 0.075 | 0.076 | 0.075 | 0.067 | 0.068 | 0.065 |  |
|             | xr: | 0.404         | 0.082 | 0.082 | 0.059 | 0.059 | 0.063 | 0.062 | 0.080 | 0.078 |  |
|             | yr: | 0.200         | 0.138 | 0.138 | 0.072 | 0.073 | 0.046 | 0.044 | 0.055 | 0.049 |  |
|             | zr: | 0.236         | 0.070 | 0.070 | 0.047 | 0.047 | 0.029 | 0.028 | 0.057 | 0.046 |  |
| $b=700$     | xt: | 0.207         | 0.091 | 0.089 | 0.102 | 0.081 | 0.096 | 0.091 | 0.104 | 0.099 |  |
|             | yt: | 0.206         | 0.134 | 0.132 | 0.178 | 0.154 | 0.177 | 0.142 | 0.168 | 0.143 |  |
|             | zt: | 0.151         | 0.138 | 0.131 | 0.156 | 0.151 | 0.178 | 0.166 | 0.157 | 0.162 |  |
|             | xr: | 0.153         | 0.066 | 0.067 | 0.080 | 0.077 | 0.096 | 0.090 | 0.124 | 0.095 |  |
|             | yr: | 0.365         | 0.196 | 0.234 | 0.203 | 0.169 | 0.180 | 0.174 | 0.228 | 0.165 |  |
|             | zr: | 0.153         | 0.076 | 0.046 | 0.069 | 0.058 | 0.078 | 0.080 | 0.091 | 0.088 |  |
| $b=2000$    | xt: | 0.206         | 0.156 | 0.137 | 0.156 | 0.161 | 0.158 | 0.168 | 0.179 | 0.169 |  |
|             | yt: | 0.253         | 0.244 | 0.246 | 0.255 | 0.242 | 0.253 | 0.246 | 0.260 | 0.245 |  |
|             | zt: | 0.181         | 0.182 | 0.165 | 0.174 | 0.176 | 0.188 | 0.183 | 0.163 | 0.167 |  |
|             | xr: | 0.192         | 0.111 | 0.115 | 0.134 | 0.133 | 0.159 | 0.144 | 0.193 | 0.148 |  |
|             | yr: | 0.256         | 0.213 | 0.228 | 0.270 | 0.236 | 0.266 | 0.242 | 0.277 | 0.249 |  |
|             | zr: | 0.218         | 0.101 | 0.107 | 0.094 | 0.111 | 0.113 | 0.110 | 0.121 | 0.104 |  |

Table S8: Registration error for single-band simulations with normal motion, outliers and an SNR of 20.

|             |                  |       |       |       |       |       |       |       |       |       |
|-------------|------------------|-------|-------|-------|-------|-------|-------|-------|-------|-------|
| Band:       | MB3              |       |       |       |       |       |       |       |       |       |
| Movement:   | Large            |       |       |       |       |       |       |       |       |       |
| Data:       | Without outliers |       |       |       |       |       |       |       |       |       |
| SNR:        | 40               |       |       |       |       |       |       |       |       |       |
| MP-order:   | 0                | 2     |       | 4     |       | 8     |       | 16    |       |       |
| $\lambda$ : |                  | 1     | 10    | 1     | 10    | 1     | 10    | 1     | 10    |       |
| $b=0$       | xt:              | 0.222 | 0.089 | 0.089 | 0.087 | 0.087 | 0.087 | 0.087 | 0.086 | 0.087 |
|             | yt:              | 0.187 | 0.080 | 0.080 | 0.079 | 0.079 | 0.078 | 0.079 | 0.078 | 0.078 |
|             | zt:              | 0.103 | 0.048 | 0.047 | 0.051 | 0.050 | 0.047 | 0.048 | 0.048 | 0.045 |
|             | xr:              | 0.212 | 0.079 | 0.079 | 0.078 | 0.078 | 0.078 | 0.079 | 0.081 | 0.078 |
|             | yr:              | 0.351 | 0.177 | 0.177 | 0.172 | 0.172 | 0.177 | 0.174 | 0.176 | 0.178 |
|             | zr:              | 0.182 | 0.105 | 0.105 | 0.103 | 0.103 | 0.104 | 0.104 | 0.105 | 0.105 |
| $b=700$     | xt:              | 0.370 | 0.120 | 0.121 | 0.127 | 0.124 | 0.123 | 0.119 | 0.123 | 0.123 |
|             | yt:              | 0.217 | 0.177 | 0.172 | 0.189 | 0.196 | 0.211 | 0.182 | 0.191 | 0.190 |
|             | zt:              | 0.300 | 0.127 | 0.129 | 0.136 | 0.130 | 0.131 | 0.128 | 0.131 | 0.127 |
|             | xr:              | 0.380 | 0.130 | 0.139 | 0.126 | 0.119 | 0.135 | 0.115 | 0.124 | 0.138 |
|             | yr:              | 0.620 | 0.385 | 0.354 | 0.376 | 0.396 | 0.395 | 0.416 | 0.415 | 0.384 |
|             | zr:              | 0.379 | 0.152 | 0.145 | 0.169 | 0.168 | 0.180 | 0.177 | 0.174 | 0.174 |
| $b=2000$    | xt:              | 0.402 | 0.209 | 0.215 | 0.201 | 0.183 | 0.188 | 0.201 | 0.191 | 0.203 |
|             | yt:              | 0.429 | 0.295 | 0.293 | 0.299 | 0.299 | 0.293 | 0.296 | 0.290 | 0.304 |
|             | zt:              | 0.327 | 0.136 | 0.149 | 0.133 | 0.149 | 0.131 | 0.141 | 0.122 | 0.136 |
|             | xr:              | 0.209 | 0.080 | 0.073 | 0.103 | 0.088 | 0.092 | 0.069 | 0.084 | 0.098 |
|             | yr:              | 0.256 | 0.162 | 0.133 | 0.165 | 0.150 | 0.127 | 0.180 | 0.179 | 0.165 |
|             | zr:              | 0.198 | 0.127 | 0.129 | 0.157 | 0.120 | 0.126 | 0.137 | 0.126 | 0.150 |

Table S9: Registration error for single-band simulations with long TR, large motion, no outliers and an SNR of 40.

|             |     |                  |       |       |       |       |       |       |       |       |
|-------------|-----|------------------|-------|-------|-------|-------|-------|-------|-------|-------|
| Band:       |     | MB3              |       |       |       |       |       |       |       |       |
| Movement:   |     | Large            |       |       |       |       |       |       |       |       |
| Data:       |     | Without outliers |       |       |       |       |       |       |       |       |
| SNR:        |     | 20               |       |       |       |       |       |       |       |       |
| MP-order:   |     | 0                | 2     |       | 4     |       | 8     |       | 16    |       |
| $\lambda$ : |     |                  | 1     | 10    | 1     | 10    | 1     | 10    | 1     | 10    |
| $b=0$       | xt: | 0.222            | 0.089 | 0.089 | 0.087 | 0.087 | 0.087 | 0.087 | 0.086 | 0.087 |
|             | yt: | 0.188            | 0.080 | 0.080 | 0.079 | 0.079 | 0.078 | 0.079 | 0.078 | 0.079 |
|             | zt: | 0.103            | 0.047 | 0.048 | 0.048 | 0.048 | 0.049 | 0.049 | 0.052 | 0.049 |
|             | xr: | 0.212            | 0.079 | 0.079 | 0.078 | 0.078 | 0.079 | 0.079 | 0.081 | 0.079 |
|             | yr: | 0.351            | 0.176 | 0.176 | 0.174 | 0.175 | 0.174 | 0.173 | 0.172 | 0.171 |
|             | zr: | 0.182            | 0.105 | 0.105 | 0.104 | 0.104 | 0.104 | 0.103 | 0.104 | 0.103 |
| $b=700$     | xt: | 0.370            | 0.126 | 0.124 | 0.121 | 0.129 | 0.123 | 0.134 | 0.124 | 0.122 |
|             | yt: | 0.216            | 0.156 | 0.153 | 0.151 | 0.152 | 0.153 | 0.154 | 0.161 | 0.154 |
|             | zt: | 0.305            | 0.145 | 0.149 | 0.145 | 0.141 | 0.142 | 0.143 | 0.145 | 0.144 |
|             | xr: | 0.376            | 0.109 | 0.115 | 0.110 | 0.120 | 0.114 | 0.123 | 0.121 | 0.112 |
|             | yr: | 0.615            | 0.411 | 0.398 | 0.380 | 0.382 | 0.393 | 0.364 | 0.388 | 0.390 |
|             | zr: | 0.371            | 0.160 | 0.185 | 0.165 | 0.153 | 0.186 | 0.158 | 0.159 | 0.150 |
| $b=2000$    | xt: | 0.407            | 0.179 | 0.196 | 0.167 | 0.190 | 0.165 | 0.198 | 0.168 | 0.175 |
|             | yt: | 0.424            | 0.265 | 0.281 | 0.272 | 0.267 | 0.273 | 0.282 | 0.264 | 0.270 |
|             | zt: | 0.316            | 0.147 | 0.169 | 0.159 | 0.160 | 0.161 | 0.175 | 0.163 | 0.172 |
|             | xr: | 0.202            | 0.095 | 0.079 | 0.093 | 0.086 | 0.094 | 0.085 | 0.099 | 0.091 |
|             | yr: | 0.253            | 0.173 | 0.172 | 0.174 | 0.166 | 0.182 | 0.170 | 0.166 | 0.169 |
|             | zr: | 0.196            | 0.094 | 0.096 | 0.078 | 0.077 | 0.079 | 0.086 | 0.091 | 0.084 |

Table S10: Registration error for single-band simulations with long TR, large motion, no outliers and an SNR of 20.

| Band:       |     | MB3 Short TR  |       |       |       |       |       |       |       |       |       |
|-------------|-----|---------------|-------|-------|-------|-------|-------|-------|-------|-------|-------|
| Movement:   |     | Large         |       |       |       |       |       |       |       |       |       |
| Data:       |     | With outliers |       |       |       |       |       |       |       |       |       |
| SNR:        |     | 40            |       |       |       |       |       |       |       |       |       |
| MP-order:   |     | 0             | 2     |       | 4     |       | 8     |       | 16    |       |       |
| $\lambda$ : |     |               | 1     | 10    | 1     | 10    | 1     | 10    | 1     | 10    |       |
| $b=0$       | xt: | 0.221         | 0.090 | 0.090 | 0.088 | 0.088 | 0.088 | 0.088 | 0.088 | 0.088 | 0.088 |
|             | yt: | 0.190         | 0.080 | 0.080 | 0.079 | 0.079 | 0.079 | 0.079 | 0.079 | 0.079 | 0.079 |
|             | zt: | 0.105         | 0.054 | 0.055 | 0.055 | 0.054 | 0.061 | 0.060 | 0.061 | 0.060 | 0.060 |
|             | xr: | 0.210         | 0.085 | 0.085 | 0.083 | 0.083 | 0.086 | 0.085 | 0.088 | 0.086 | 0.086 |
|             | yr: | 0.349         | 0.179 | 0.179 | 0.177 | 0.178 | 0.172 | 0.171 | 0.171 | 0.171 | 0.171 |
|             | zr: | 0.178         | 0.104 | 0.104 | 0.103 | 0.103 | 0.102 | 0.101 | 0.102 | 0.102 | 0.101 |
| $b=700$     | xt: | 0.380         | 0.201 | 0.200 | 0.206 | 0.203 | 0.208 | 0.205 | 0.205 | 0.202 | 0.202 |
|             | yt: | 0.246         | 0.210 | 0.213 | 0.223 | 0.221 | 0.227 | 0.207 | 0.212 | 0.219 | 0.219 |
|             | zt: | 0.313         | 0.206 | 0.207 | 0.208 | 0.206 | 0.209 | 0.207 | 0.211 | 0.208 | 0.208 |
|             | xr: | 0.382         | 0.186 | 0.194 | 0.189 | 0.188 | 0.197 | 0.186 | 0.204 | 0.184 | 0.184 |
|             | yr: | 0.626         | 0.460 | 0.460 | 0.475 | 0.475 | 0.446 | 0.455 | 0.452 | 0.459 | 0.459 |
|             | zr: | 0.373         | 0.182 | 0.185 | 0.190 | 0.186 | 0.197 | 0.197 | 0.190 | 0.192 | 0.192 |
| $b=2000$    | xt: | 0.410         | 0.224 | 0.232 | 0.244 | 0.228 | 0.231 | 0.233 | 0.228 | 0.276 | 0.276 |
|             | yt: | 0.444         | 0.326 | 0.337 | 0.330 | 0.342 | 0.335 | 0.342 | 0.330 | 0.354 | 0.354 |
|             | zt: | 0.328         | 0.166 | 0.193 | 0.172 | 0.185 | 0.172 | 0.207 | 0.177 | 0.208 | 0.208 |
|             | xr: | 0.244         | 0.119 | 0.122 | 0.124 | 0.126 | 0.135 | 0.129 | 0.131 | 0.128 | 0.128 |
|             | yr: | 0.276         | 0.199 | 0.180 | 0.213 | 0.197 | 0.176 | 0.159 | 0.183 | 0.187 | 0.187 |
|             | zr: | 0.208         | 0.115 | 0.154 | 0.169 | 0.158 | 0.160 | 0.166 | 0.132 | 0.200 | 0.200 |

Table S11: Registration error for single-band simulations with long TR, large motion, outliers and an SNR of 40.

| Band:       |     | MB3 Short TR  |       |       |       |       |       |       |       |       |  |
|-------------|-----|---------------|-------|-------|-------|-------|-------|-------|-------|-------|--|
| Movement:   |     | Large         |       |       |       |       |       |       |       |       |  |
| Data:       |     | With outliers |       |       |       |       |       |       |       |       |  |
| SNR:        |     | 20            |       |       |       |       |       |       |       |       |  |
| MP-order:   |     | 0             | 2     |       | 4     |       | 8     |       | 16    |       |  |
| $\lambda$ : |     |               | 1     | 10    | 1     | 10    | 1     | 10    | 1     | 10    |  |
| $b=0$       | xt: | 0.221         | 0.089 | 0.089 | 0.088 | 0.087 | 0.088 | 0.088 | 0.087 | 0.088 |  |
|             | yt: | 0.190         | 0.081 | 0.081 | 0.079 | 0.080 | 0.079 | 0.079 | 0.079 | 0.079 |  |
|             | zt: | 0.105         | 0.072 | 0.072 | 0.064 | 0.068 | 0.059 | 0.058 | 0.061 | 0.058 |  |
|             | xr: | 0.210         | 0.090 | 0.090 | 0.086 | 0.087 | 0.085 | 0.085 | 0.088 | 0.086 |  |
|             | yr: | 0.349         | 0.169 | 0.169 | 0.172 | 0.170 | 0.174 | 0.174 | 0.172 | 0.173 |  |
|             | zr: | 0.178         | 0.102 | 0.102 | 0.101 | 0.101 | 0.102 | 0.102 | 0.102 | 0.102 |  |
| $b=700$     | xt: | 0.386         | 0.206 | 0.206 | 0.208 | 0.209 | 0.209 | 0.205 | 0.208 | 0.205 |  |
|             | yt: | 0.251         | 0.196 | 0.195 | 0.194 | 0.201 | 0.202 | 0.196 | 0.197 | 0.197 |  |
|             | zt: | 0.315         | 0.220 | 0.221 | 0.216 | 0.224 | 0.217 | 0.215 | 0.218 | 0.213 |  |
|             | xr: | 0.379         | 0.174 | 0.176 | 0.192 | 0.191 | 0.196 | 0.184 | 0.204 | 0.190 |  |
|             | yr: | 0.593         | 0.397 | 0.385 | 0.418 | 0.420 | 0.438 | 0.425 | 0.439 | 0.449 |  |
|             | zr: | 0.370         | 0.171 | 0.188 | 0.179 | 0.198 | 0.187 | 0.190 | 0.209 | 0.190 |  |
| $b=2000$    | xt: | 0.408         | 0.226 | 0.241 | 0.212 | 0.240 | 0.210 | 0.242 | 0.206 | 0.233 |  |
|             | yt: | 0.427         | 0.292 | 0.315 | 0.292 | 0.316 | 0.303 | 0.324 | 0.298 | 0.319 |  |
|             | zt: | 0.318         | 0.229 | 0.244 | 0.199 | 0.241 | 0.190 | 0.214 | 0.189 | 0.222 |  |
|             | xr: | 0.250         | 0.120 | 0.135 | 0.144 | 0.147 | 0.142 | 0.144 | 0.139 | 0.141 |  |
|             | yr: | 0.248         | 0.152 | 0.175 | 0.183 | 0.164 | 0.190 | 0.189 | 0.190 | 0.175 |  |
|             | zr: | 0.209         | 0.096 | 0.121 | 0.100 | 0.115 | 0.101 | 0.110 | 0.099 | 0.109 |  |

Table S12: Registration error for single-band simulations with long TR, large motion, outliers and an SNR of 20.

| Band:       | MB3 Short TR     |       |       |       |       |       |       |       |       |       |
|-------------|------------------|-------|-------|-------|-------|-------|-------|-------|-------|-------|
| Movement:   | Normal           |       |       |       |       |       |       |       |       |       |
| Data:       | Without outliers |       |       |       |       |       |       |       |       |       |
| SNR:        | 40               |       |       |       |       |       |       |       |       |       |
| MP-order:   | 0                | 2     |       | 4     |       | 8     |       | 16    |       |       |
| $\lambda$ : |                  | 1     | 10    | 1     | 10    | 1     | 10    | 1     | 10    |       |
| $b=0$       | xt:              | 0.072 | 0.023 | 0.023 | 0.026 | 0.024 | 0.034 | 0.029 | 0.036 | 0.031 |
|             | yt:              | 0.062 | 0.027 | 0.026 | 0.025 | 0.025 | 0.024 | 0.024 | 0.024 | 0.024 |
|             | zt:              | 0.043 | 0.035 | 0.035 | 0.035 | 0.035 | 0.036 | 0.035 | 0.036 | 0.035 |
|             | xr:              | 0.075 | 0.036 | 0.037 | 0.040 | 0.039 | 0.043 | 0.042 | 0.045 | 0.042 |
|             | yr:              | 0.107 | 0.038 | 0.038 | 0.038 | 0.038 | 0.040 | 0.040 | 0.041 | 0.040 |
|             | zr:              | 0.052 | 0.015 | 0.015 | 0.013 | 0.013 | 0.015 | 0.014 | 0.016 | 0.014 |
| $b=700$     | xt:              | 0.163 | 0.128 | 0.150 | 0.133 | 0.120 | 0.119 | 0.118 | 0.121 | 0.104 |
|             | yt:              | 0.133 | 0.207 | 0.185 | 0.244 | 0.201 | 0.187 | 0.242 | 0.215 | 0.198 |
|             | zt:              | 0.139 | 0.112 | 0.101 | 0.110 | 0.118 | 0.127 | 0.108 | 0.114 | 0.110 |
|             | xr:              | 0.133 | 0.057 | 0.053 | 0.047 | 0.062 | 0.063 | 0.043 | 0.058 | 0.056 |
|             | yr:              | 0.235 | 0.151 | 0.120 | 0.189 | 0.133 | 0.097 | 0.152 | 0.159 | 0.171 |
|             | zr:              | 0.134 | 0.042 | 0.046 | 0.045 | 0.039 | 0.040 | 0.037 | 0.047 | 0.042 |
| $b=2000$    | xt:              | 0.209 | 0.194 | 0.215 | 0.203 | 0.196 | 0.161 | 0.192 | 0.182 | 0.186 |
|             | yt:              | 0.287 | 0.293 | 0.292 | 0.290 | 0.297 | 0.285 | 0.301 | 0.296 | 0.288 |
|             | zt:              | 0.146 | 0.104 | 0.099 | 0.108 | 0.112 | 0.106 | 0.111 | 0.105 | 0.108 |
|             | xr:              | 0.122 | 0.085 | 0.086 | 0.091 | 0.088 | 0.084 | 0.077 | 0.094 | 0.076 |
|             | yr:              | 0.135 | 0.119 | 0.105 | 0.104 | 0.125 | 0.105 | 0.113 | 0.115 | 0.101 |
|             | zr:              | 0.142 | 0.182 | 0.188 | 0.154 | 0.157 | 0.143 | 0.227 | 0.129 | 0.135 |

Table S13: Registration error for single-band simulations with long TR, normal motion, no outliers and an SNR of 40.



| Band:       |     | MB3 Short TR     |       |       |       |       |       |       |       |       |  |
|-------------|-----|------------------|-------|-------|-------|-------|-------|-------|-------|-------|--|
| Movement:   |     | Normal           |       |       |       |       |       |       |       |       |  |
| Data:       |     | Without outliers |       |       |       |       |       |       |       |       |  |
| SNR:        |     | 20               |       |       |       |       |       |       |       |       |  |
| MP-order:   |     | 0                | 2     |       | 4     |       | 8     |       | 16    |       |  |
| $\lambda$ : |     |                  | 1     | 10    | 1     | 10    | 1     | 10    | 1     | 10    |  |
| $b=0$       | xt: | 0.072            | 0.052 | 0.052 | 0.052 | 0.052 | 0.030 | 0.033 | 0.033 | 0.024 |  |
|             | yt: | 0.062            | 0.022 | 0.022 | 0.023 | 0.023 | 0.024 | 0.025 | 0.024 | 0.025 |  |
|             | zt: | 0.043            | 0.044 | 0.044 | 0.044 | 0.044 | 0.036 | 0.039 | 0.036 | 0.035 |  |
|             | xr: | 0.075            | 0.054 | 0.054 | 0.056 | 0.057 | 0.043 | 0.047 | 0.045 | 0.041 |  |
|             | yr: | 0.108            | 0.048 | 0.048 | 0.049 | 0.049 | 0.040 | 0.044 | 0.041 | 0.039 |  |
|             | zr: | 0.052            | 0.022 | 0.022 | 0.022 | 0.022 | 0.014 | 0.018 | 0.016 | 0.014 |  |
| $b=700$     | xt: | 0.166            | 0.099 | 0.095 | 0.102 | 0.094 | 0.119 | 0.130 | 0.124 | 0.127 |  |
|             | yt: | 0.138            | 0.167 | 0.161 | 0.173 | 0.157 | 0.155 | 0.150 | 0.161 | 0.168 |  |
|             | zt: | 0.124            | 0.131 | 0.137 | 0.136 | 0.136 | 0.119 | 0.125 | 0.119 | 0.114 |  |
|             | xr: | 0.142            | 0.052 | 0.046 | 0.058 | 0.048 | 0.054 | 0.052 | 0.054 | 0.054 |  |
|             | yr: | 0.292            | 0.191 | 0.177 | 0.140 | 0.171 | 0.180 | 0.181 | 0.204 | 0.193 |  |
|             | zr: | 0.124            | 0.040 | 0.037 | 0.043 | 0.046 | 0.064 | 0.052 | 0.059 | 0.058 |  |
| $b=2000$    | xt: | 0.173            | 0.102 | 0.090 | 0.101 | 0.117 | 0.120 | 0.129 | 0.133 | 0.142 |  |
|             | yt: | 0.266            | 0.268 | 0.256 | 0.269 | 0.259 | 0.266 | 0.262 | 0.250 | 0.257 |  |
|             | zt: | 0.133            | 0.121 | 0.125 | 0.124 | 0.122 | 0.111 | 0.115 | 0.109 | 0.119 |  |
|             | xr: | 0.136            | 0.076 | 0.086 | 0.093 | 0.100 | 0.103 | 0.085 | 0.095 | 0.084 |  |
|             | yr: | 0.125            | 0.113 | 0.111 | 0.117 | 0.112 | 0.131 | 0.118 | 0.126 | 0.116 |  |
|             | zr: | 0.125            | 0.156 | 0.140 | 0.144 | 0.155 | 0.131 | 0.114 | 0.137 | 0.150 |  |

Table S14: Registration error for single-band simulations with long TR, normal motion, no outliers and an SNR of 20.

| Band:       | MB3 Short TR  |       |       |       |       |       |       |       |       |       |
|-------------|---------------|-------|-------|-------|-------|-------|-------|-------|-------|-------|
| Movement:   | Normal        |       |       |       |       |       |       |       |       |       |
| Data:       | With outliers |       |       |       |       |       |       |       |       |       |
| SNR:        | 40            |       |       |       |       |       |       |       |       |       |
| MP-order:   | 0             | 2     |       | 4     |       | 8     |       | 16    |       |       |
| $\lambda$ : |               | 1     | 10    | 1     | 10    | 1     | 10    | 1     | 10    |       |
| $b=0$       | xt:           | 0.072 | 0.024 | 0.024 | 0.027 | 0.025 | 0.034 | 0.030 | 0.036 | 0.031 |
|             | yt:           | 0.062 | 0.026 | 0.026 | 0.025 | 0.025 | 0.024 | 0.024 | 0.024 | 0.024 |
|             | zt:           | 0.043 | 0.035 | 0.035 | 0.035 | 0.035 | 0.036 | 0.035 | 0.036 | 0.035 |
|             | xr:           | 0.074 | 0.038 | 0.038 | 0.039 | 0.039 | 0.043 | 0.042 | 0.045 | 0.042 |
|             | yr:           | 0.108 | 0.038 | 0.038 | 0.039 | 0.038 | 0.040 | 0.040 | 0.041 | 0.040 |
|             | zr:           | 0.052 | 0.014 | 0.014 | 0.013 | 0.013 | 0.015 | 0.014 | 0.016 | 0.014 |
| $b=700$     | xt:           | 0.169 | 0.144 | 0.127 | 0.120 | 0.124 | 0.116 | 0.123 | 0.112 | 0.118 |
|             | yt:           | 0.155 | 0.176 | 0.201 | 0.182 | 0.167 | 0.185 | 0.158 | 0.185 | 0.191 |
|             | zt:           | 0.120 | 0.109 | 0.119 | 0.115 | 0.109 | 0.116 | 0.114 | 0.128 | 0.130 |
|             | xr:           | 0.144 | 0.062 | 0.056 | 0.049 | 0.054 | 0.058 | 0.066 | 0.063 | 0.054 |
|             | yr:           | 0.263 | 0.166 | 0.124 | 0.109 | 0.158 | 0.157 | 0.133 | 0.129 | 0.098 |
|             | zr:           | 0.125 | 0.053 | 0.049 | 0.054 | 0.043 | 0.049 | 0.048 | 0.055 | 0.061 |
| $b=2000$    | xt:           | 0.186 | 0.180 | 0.210 | 0.177 | 0.167 | 0.178 | 0.158 | 0.158 | 0.187 |
|             | yt:           | 0.267 | 0.291 | 0.304 | 0.305 | 0.293 | 0.303 | 0.303 | 0.292 | 0.287 |
|             | zt:           | 0.141 | 0.107 | 0.110 | 0.112 | 0.108 | 0.118 | 0.115 | 0.112 | 0.119 |
|             | xr:           | 0.175 | 0.091 | 0.071 | 0.079 | 0.089 | 0.094 | 0.089 | 0.113 | 0.072 |
|             | yr:           | 0.136 | 0.101 | 0.106 | 0.105 | 0.105 | 0.114 | 0.102 | 0.106 | 0.118 |
|             | zr:           | 0.123 | 0.156 | 0.186 | 0.114 | 0.135 | 0.172 | 0.120 | 0.205 | 0.127 |

Table S15: Registration error for single-band simulations with long TR, normal motion, outliers and an SNR of 40.

| Band:       |     | MB3 Short TR  |       |       |       |       |       |       |       |       |  |
|-------------|-----|---------------|-------|-------|-------|-------|-------|-------|-------|-------|--|
| Movement:   |     | Normal        |       |       |       |       |       |       |       |       |  |
| Data:       |     | With outliers |       |       |       |       |       |       |       |       |  |
| SNR:        |     | 20            |       |       |       |       |       |       |       |       |  |
| MP-order:   |     | 0             | 2     |       | 4     |       | 8     |       | 16    |       |  |
| $\lambda$ : |     |               | 1     | 10    | 1     | 10    | 1     | 10    | 1     | 10    |  |
| $b=0$       | xt: | 0.072         | 0.052 | 0.052 | 0.053 | 0.052 | 0.030 | 0.033 | 0.033 | 0.025 |  |
|             | yt: | 0.062         | 0.022 | 0.022 | 0.023 | 0.023 | 0.025 | 0.026 | 0.024 | 0.025 |  |
|             | zt: | 0.043         | 0.044 | 0.044 | 0.044 | 0.044 | 0.036 | 0.040 | 0.036 | 0.035 |  |
|             | xr: | 0.075         | 0.054 | 0.054 | 0.056 | 0.057 | 0.043 | 0.047 | 0.045 | 0.041 |  |
|             | yr: | 0.108         | 0.048 | 0.048 | 0.049 | 0.049 | 0.040 | 0.044 | 0.041 | 0.039 |  |
|             | zr: | 0.052         | 0.021 | 0.021 | 0.021 | 0.021 | 0.014 | 0.018 | 0.016 | 0.014 |  |
| $b=700$     | xt: | 0.166         | 0.085 | 0.098 | 0.113 | 0.096 | 0.104 | 0.121 | 0.101 | 0.124 |  |
|             | yt: | 0.144         | 0.165 | 0.174 | 0.162 | 0.162 | 0.167 | 0.150 | 0.158 | 0.156 |  |
|             | zt: | 0.120         | 0.124 | 0.130 | 0.135 | 0.138 | 0.128 | 0.118 | 0.126 | 0.119 |  |
|             | xr: | 0.138         | 0.050 | 0.051 | 0.056 | 0.052 | 0.070 | 0.059 | 0.060 | 0.070 |  |
|             | yr: | 0.290         | 0.164 | 0.172 | 0.149 | 0.156 | 0.156 | 0.199 | 0.189 | 0.172 |  |
|             | zr: | 0.124         | 0.057 | 0.050 | 0.053 | 0.043 | 0.062 | 0.049 | 0.069 | 0.055 |  |
| $b=2000$    | xt: | 0.171         | 0.104 | 0.110 | 0.097 | 0.111 | 0.131 | 0.151 | 0.139 | 0.132 |  |
|             | yt: | 0.264         | 0.272 | 0.271 | 0.266 | 0.265 | 0.260 | 0.265 | 0.259 | 0.264 |  |
|             | zt: | 0.127         | 0.124 | 0.125 | 0.125 | 0.119 | 0.106 | 0.116 | 0.115 | 0.112 |  |
|             | xr: | 0.145         | 0.081 | 0.083 | 0.100 | 0.084 | 0.103 | 0.086 | 0.099 | 0.089 |  |
|             | yr: | 0.122         | 0.108 | 0.117 | 0.117 | 0.117 | 0.132 | 0.117 | 0.123 | 0.133 |  |
|             | zr: | 0.140         | 0.116 | 0.153 | 0.161 | 0.131 | 0.093 | 0.134 | 0.106 | 0.126 |  |

Table S16: Registration error for single-band simulations with long TR, normal motion, outliers and an SNR of 20.
